# Supplementary material for: Assessment of density functional theory to calculate the phase transition pressure of ice
Source: Royal Society of Chemistry journal article supplement (doi:10.1039/c2cp41495c), 2012-01-01

## Electronic Supplementary Information for

# ”Assessment of Density Functional Theory to Calculate Phase Transition Pressure of Ice”

*Ohki Kambara<sup>+1</sup>, Kaito Takahashi<sup>\*1</sup>, Michitoshi Hayashi<sup>2</sup>, Jer-Lai Kuo<sup>\*1</sup>*

1. Institute of Atomic and Molecular Sciences, Academia Sinica, P.O. Box 23-166, Taipei 10617

Taiwan

2. Center for Condensed Matter Sciences, National Taiwan University, Taipei 106 Taiwan

\* Kaito Takahashi: kt@gate.sinica.edu.tw, Jer-Lai Kuo: jlkuo@pub.iams.sinica.edu.tw

Table S1. Comparison table between the phase transition pressures in Gpa obtained from the intersection point of enthalpy and those from internal energy with equation (1).

| Functional | Obtained from                            | Ih → II          | Ih → III        | II → VI        | VI → VII    | III → VI | Ih → VII | II → VII | III → VII |
|------------|------------------------------------------|------------------|-----------------|----------------|-------------|----------|----------|----------|-----------|
| BLYP       | Intersection point of Enthalpy           | 1.71             | 1.22            | 1.74           | --          | 2.70     | 2.72     | --       | --        |
|            | Internal energy (EL + Ezpt) with eq. (1) | 1.70             | 1.21            | 1.66           | --          | 2.66     | 2.66     | 4.07     | 4.56      |
| B3LYP      | Intersection point of Enthalpy           | 1.23             | 0.93            | 1.35           | --          | 2.03     | 2.35     | --       | --        |
|            | Internal energy (EL + Ezpt) with eq. (1) | 1.22             | 0.97            | 1.31           | --          | 1.89     | 2.27     | 3.88     | --        |
| PBE0       | Intersection point of Enthalpy           | 1.18             | 0.92            | 1.37           | --          | 1.94     | 2.24     | --       | --        |
|            | Internal energy (EL + Ezpt) with eq. (1) | 1.18             | 0.93            | 1.31           | --          | 1.85     | --       | 3.72     | 3.83      |
|            | Exp.                                     | $0.014 \pm 0.02$ | $0.24 \pm 0.01$ | $1.05 \pm 0.1$ | $2 \pm 0.1$ |          |          |          |           |

Table S2. Calculated phase transition pressures in GPa at various functionals whose experimental values were not reported previously.

|        | Zero point | III → VI | Ih → VII | II → VII | III → VII |
|--------|------------|----------|----------|----------|-----------|
| BLYP   | w/o        | 2.07     | 2.75     | 4.10     | 4.03      |
| BLYP   | with       | 2.13     | 2.72     |          |           |
| PW91   | w/o        | 2.13     | 2.65     | 3.65     | 3.60      |
| PBE    | w/o        | 1.91     | 2.49     | 3.54     | 3.46      |
| PBE-D  | w/o        | -0.36    | 0.11     | -0.07    | -0.01     |
| PBEsol | w/o        | 1.50     | 2.13     | 2.61     | 2.62      |
| B3LYP  | w/o        | 3.36     | 2.48     | 3.64     | 4.24      |
| B3LYP  | with       | 2.03     | 2.35     |          |           |
| PBE0   | w/o        | 4.40     | 2.36     | 3.19     | 4.06      |
| PBE0   | with       | 1.94     | 2.24     |          |           |
| PBE0-D | w/o        | 0.77     | 0.12     | -0.17    | 0.15      |

Table S3. Calculated phase transition pressures at PBE0 functional in various scaling factors whose experimental values were not reported. Units are in GPa.

|        | $s_6$ | III $\rightarrow$ VI | Ih $\rightarrow$ VII | II $\rightarrow$ VII | III $\rightarrow$ VII |
|--------|-------|----------------------|----------------------|----------------------|-----------------------|
| PBE0-D |       | 4.40                 | 2.36                 | 3.19                 | 4.05                  |
|        | 0.25  | 2.73                 | 1.60                 | 2.06                 | 2.51                  |
|        | 0.50  | 1.33                 | 0.85                 | 0.93                 | 1.33                  |
|        | 0.75  | 0.77                 | 0.12                 | -0.17                | 0.15                  |
|        | 1.00  | -0.03                | -0.59                | -1.35                | -0.09                 |

Figure S1 Energies of water dimer in different conformation. (a) oxygen facing structure, (b) hydrogen bonded structure. Solid lines with cross mark, triangle and circles are results by PBE0/TZP, PBE0-D/TZP (CRYSTAL09), and CCSD(T)/6-311++G(3df,3pd) (Gaussian 09), respectively. All the data are shifted by setting the energies at the O-O length of 6.0 Å to zero.

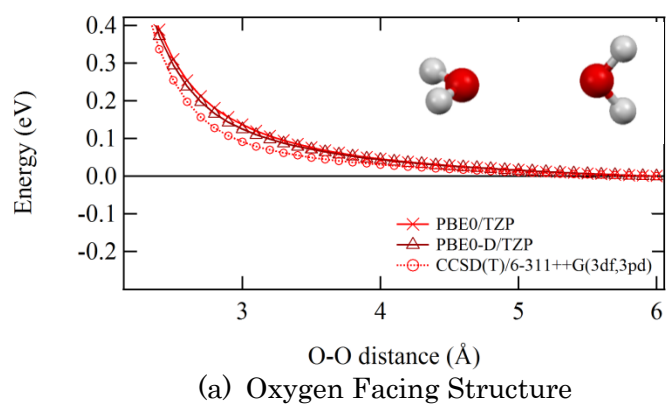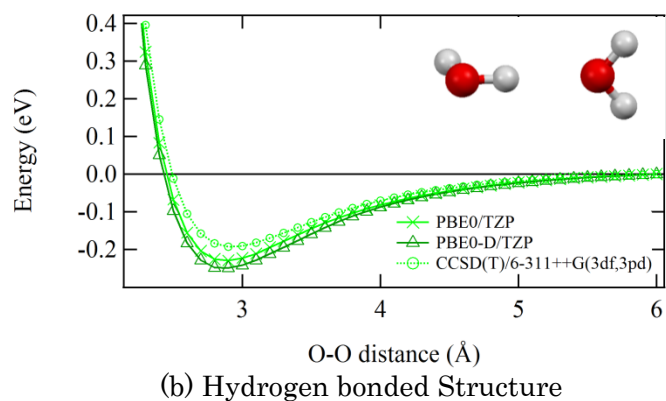

Supplement: c2cp41495c.pdf [file c2cp41495c.pdf]
